# Supplementary material
Source: publisher site journal article supplement (http://www.spandidos-publications.com/1541/downloadSupplementary)
Supplement: Supplementary file 1 [file downloadSupplementary]

Table SI. Basic clinical statistics of patients.

|                       | N (n=72)    | Clinical data    |
|-----------------------|-------------|------------------|
| Age, mean (range)     | 28-70 years | 48.72±4.57 years |
| Sex                   |             |                  |
| Males                 | 22          | 30.5%            |
| Females               | 50          | 69.4%            |
| Tumor size            |             |                  |
| ≥1 cm, <2 cm          | 19          | 0.51±0.23 cm     |
| <1 cm                 | 53          | 1.55±0.21 cm     |
| Local infiltration    |             |                  |
| Yes                   | 32          | 44.4%            |
| No                    | 40          | 55.5%            |
| TNM staging           |             |                  |
| T1N1M0                | 25          | 34.7%            |
| T1N0M0                | 47          | 65.2%            |
| Tumor differentiation |             |                  |
| Good                  | 57          | 79.1%            |
| Poor                  | 15          | 20.8%            |

TNM stage, T referred to the primary tumor; N represented lymph nodes (0 and 1 represented the presence or absence of metastasis); and M represented the presence or absence of distant metastasis. TNM, tumor node metastasis.
